# Supplementary material for: The multiple antibiotic resistance operon of enteric bacteria controls DNA repair and outer membrane integrity
Source: PubMed Central journal article supplement (PMC5684230; doi:10.1038/s41467-017-01405-7), 2017-11-13
Supplement: 41467_2017_1405_MOESM1_ESM.pdf [file 41467_2017_1405_MOESM1_ESM.pdf]

**a**

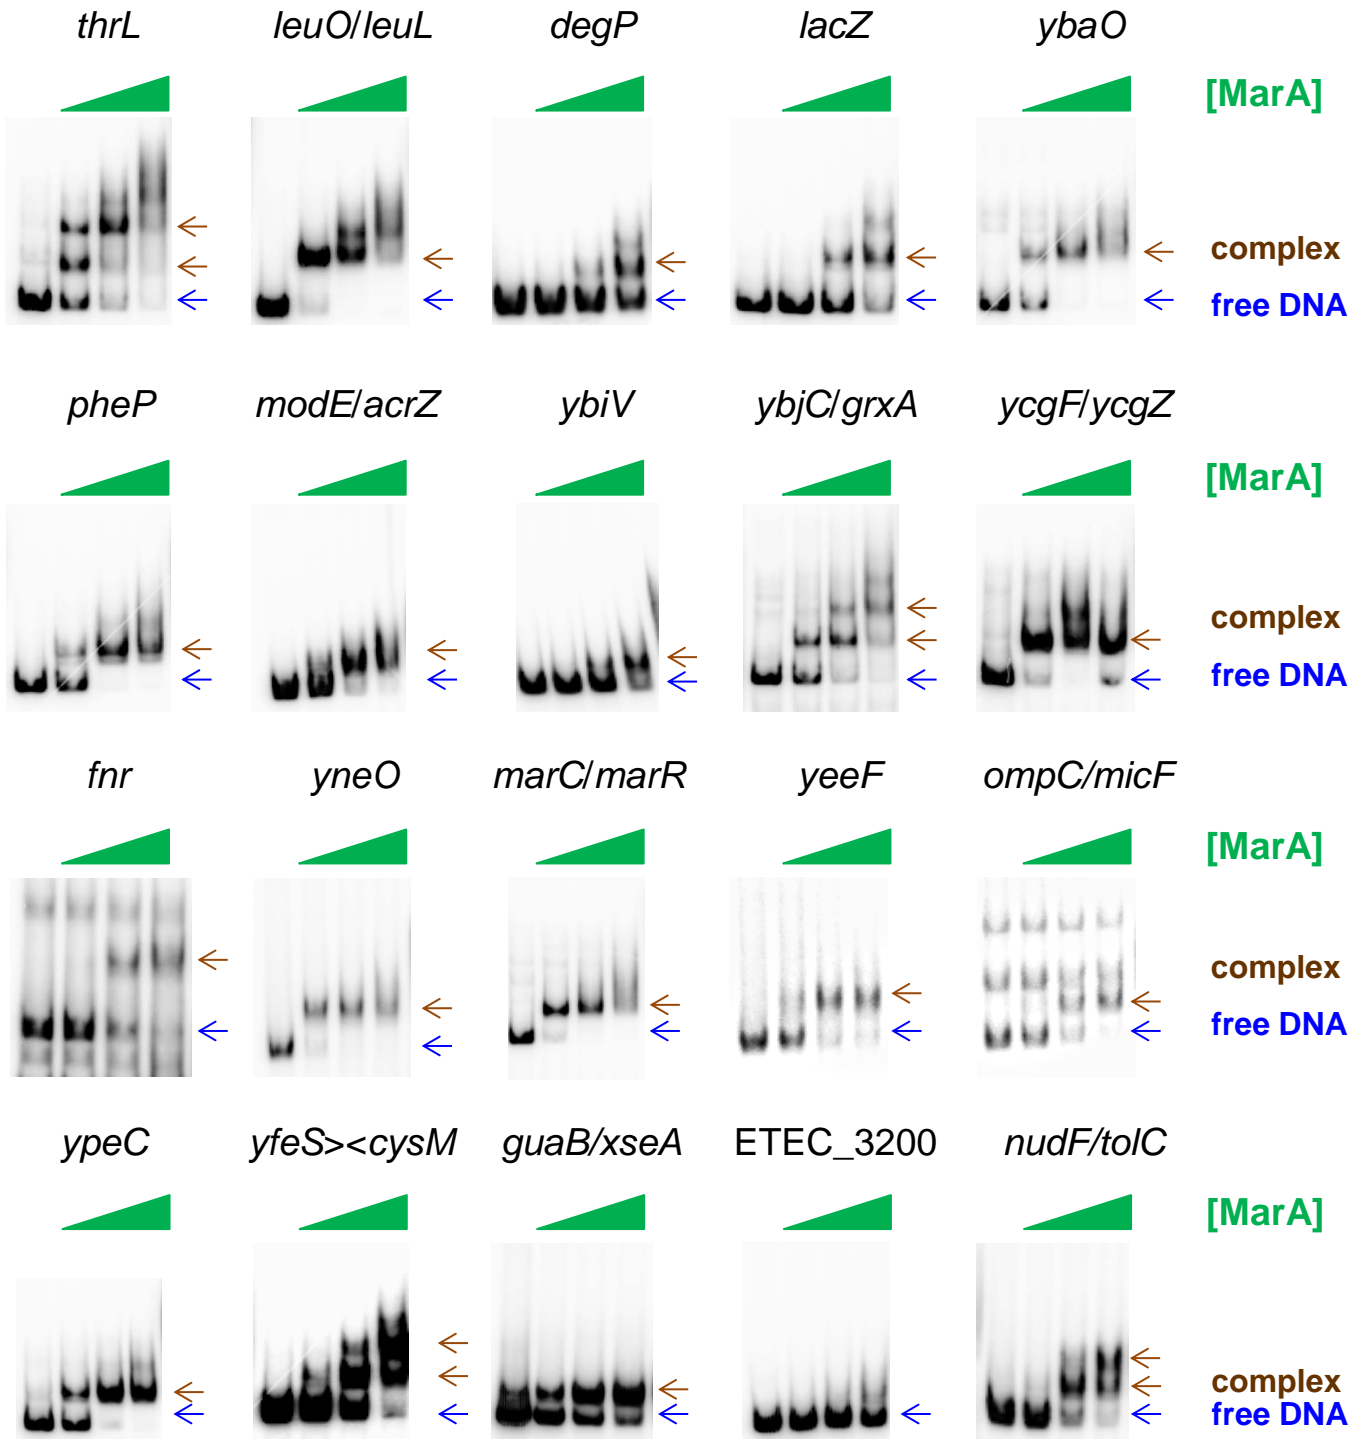

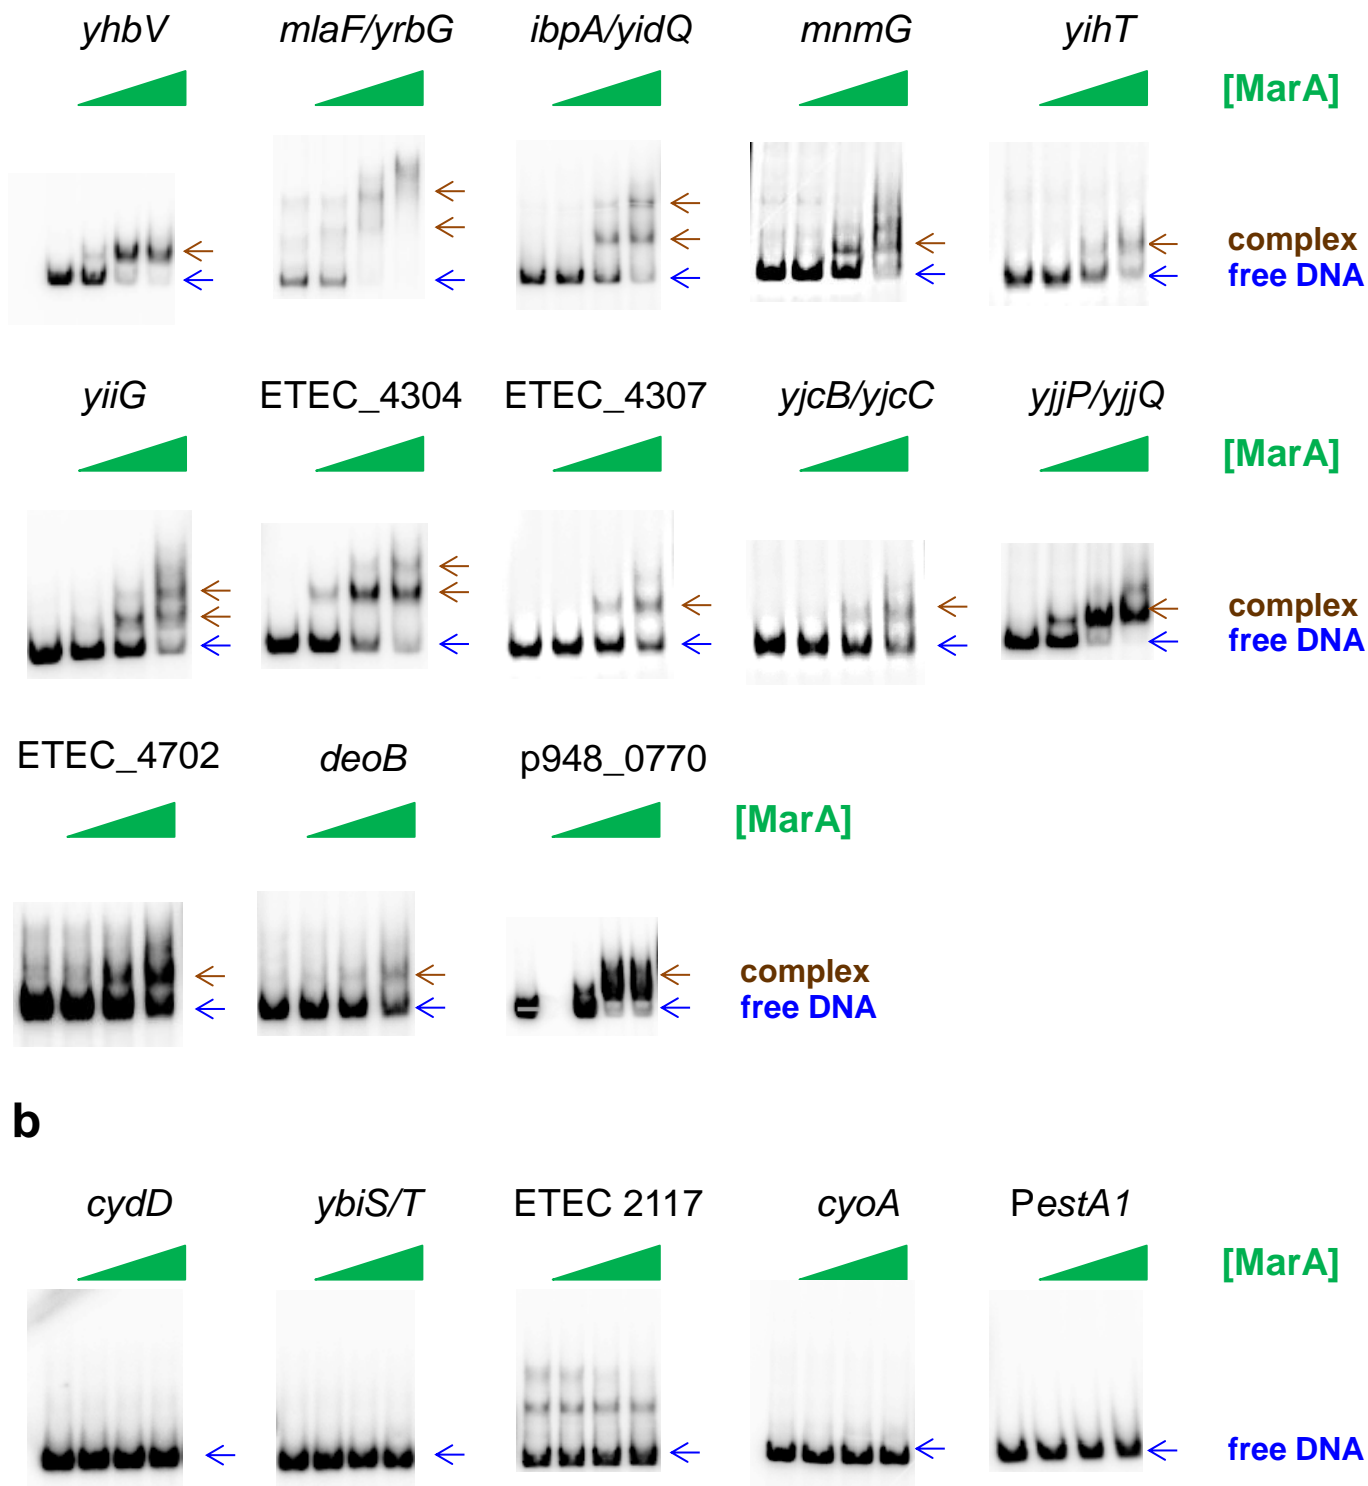

**Supplementary Figure 1: Binding of MarA to DNA fragments derived from CHIP-seq binding peaks for MarA.** Panel a) illustrates results of electrophoretic mobility shift assays with different DNA fragments containing the marbox. Panel b shows binding of equivalent MarA concentrations to DNA fragments containing no marbox. MarA was added at a final concentration of 0.3, 1.0, and 1.7  $\mu\text{M}$  as indicated by the triangle. The location of free DNA, and DNA bound by MarA, is indicated.



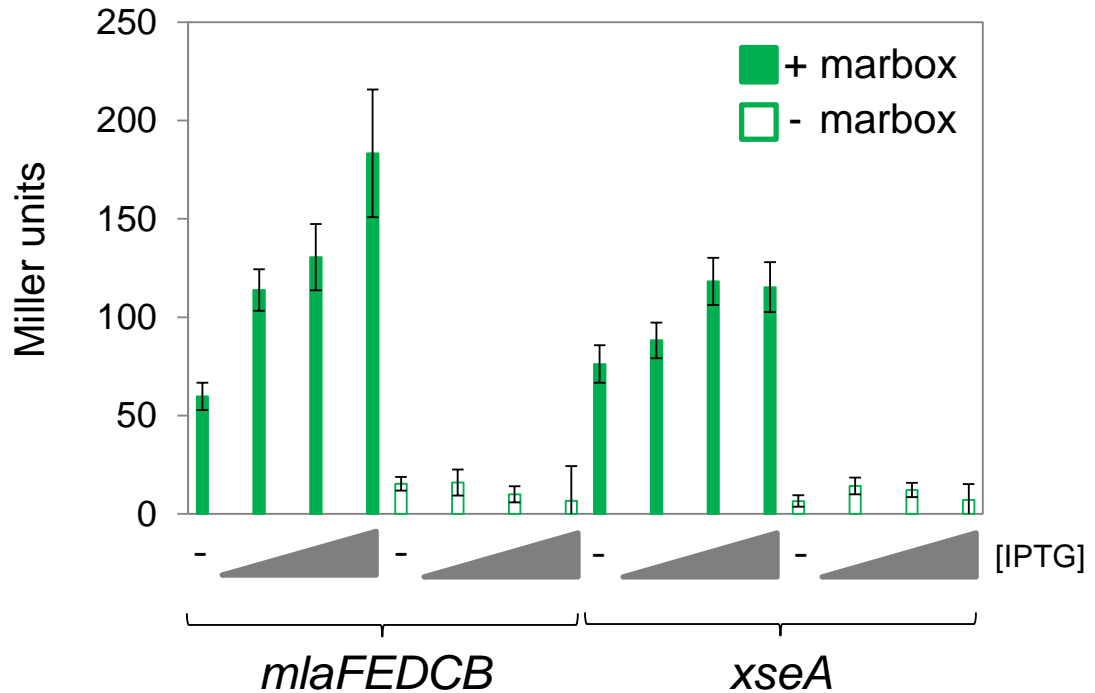

**Supplementary Figure 3: Activation of *mlaFEDCB* and *xseA* by increasing intracellular MarA: a requirement for the marbox.** The result of a  $\beta$ -galactosidase assay done using lysates of T7 express cells transformed with derivatives of the *lacZ* reporter plasmid, pRW50. Activity values obtained using empty pRW50 vector have been subtracted. Additional MarA is provided by plasmid pET21*amarA* that encodes *marA* under the control of an IPTG inducible promoter. Error bars represent standard deviation (n=3).

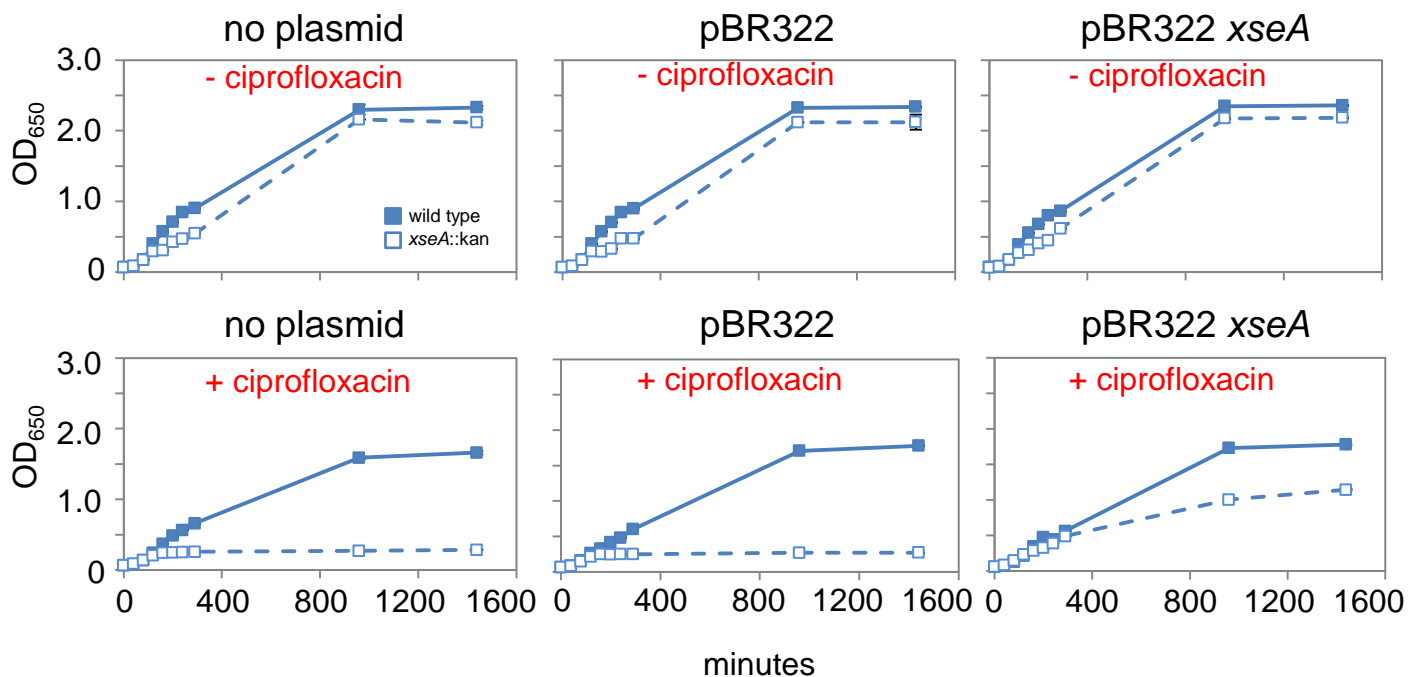

**Supplementary Figure 4: Complementation of the *xseA::kan* phenotype by *xseA*.** The graph shows OD<sub>650</sub> values obtained for liquid cultures of strain BW25113 *xseA::kan* grown in the presence or absence of 0.005  $\mu\text{g/ml}$  ciprofloxacin. The BW25113 *xseA::kan* cells were transformed with pBR322 derivatives encoding *xseA* under the control of the *xseA1* fragment. Error bars represent standard deviation (n=3).

**a**

# XseA domain organisation

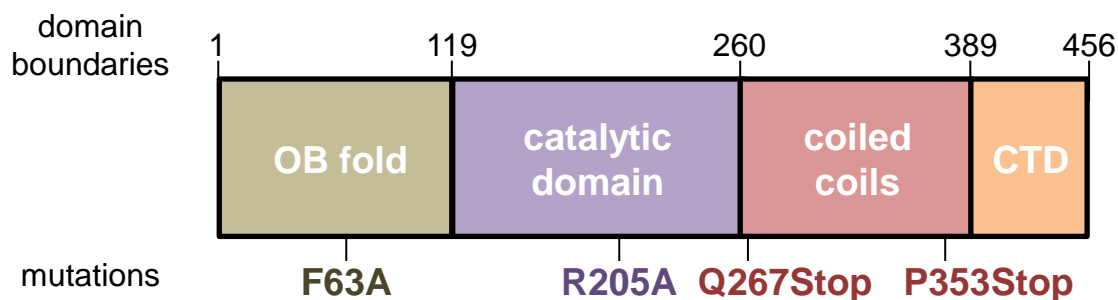**b**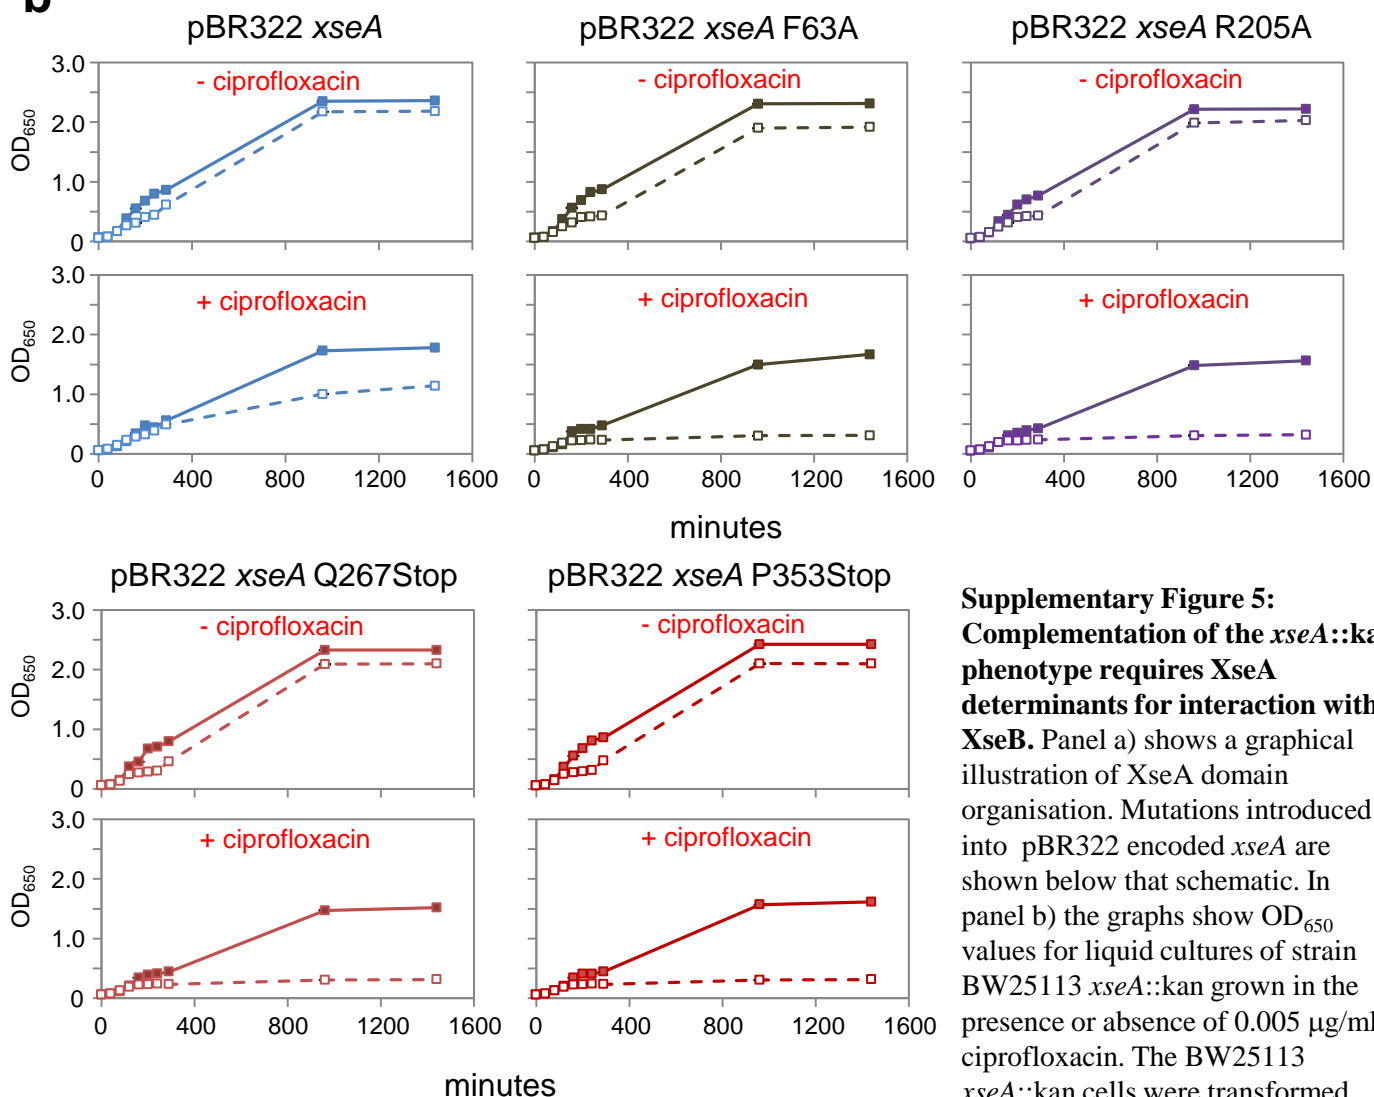

**Supplementary Figure 5:**  
**Complementation of the *xseA::kan* phenotype requires XseA determinants for interaction with XseB.** Panel a) shows a graphical illustration of XseA domain organisation. Mutations introduced into pBR322 encoded *xseA* are shown below that schematic. In panel b) the graphs show OD<sub>650</sub> values for liquid cultures of strain BW25113 *xseA::kan* grown in the presence or absence of 0.005 µg/ml ciprofloxacin. The BW25113 *xseA::kan* cells were transformed with pBR322 derivatives encoding *xseA* under the control of the *xseA1* fragment. Error bars represent standard deviation (n=3).

a

*mlaF1.1*

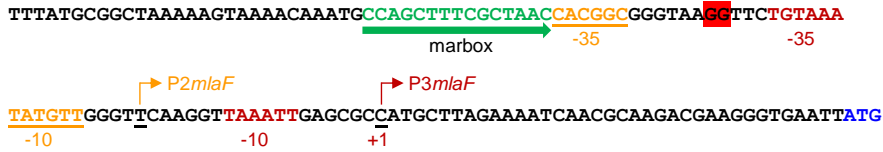

*mlaF2.1*

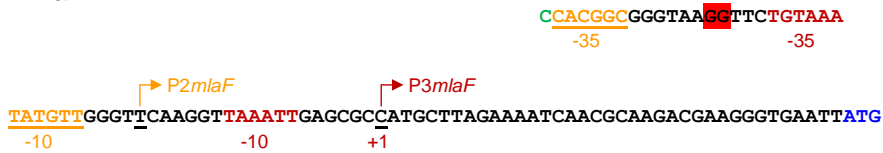

b

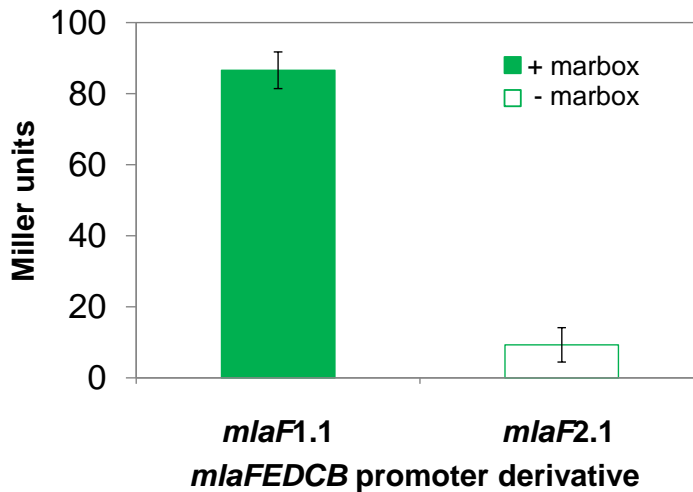

**Supplementary Figure 6: Effect of *mlaFEDCB* P1 promoter inactivation.** Panel a) shows the DNA sequence of the *mlaF1.1* and *mlaF2.1* DNA fragments. The *mlaF* start codon is shown in blue and the marbox is in green. Transcription start sites (+1) are underlined and further highlighted by a bent arrow. The P1 promoter has been inactivated by changing the sequence of the -10 element from 5'-TATTCT-3' to 5'-GGTTCT-3. The associated mutations are highlighted by the red box. Panel b) shows results of  $\beta$ -galactosidase assays using lysates of strain JCB387 transformed with pRW50 carrying either the *mlaF1.1* or *mlaF2.1* fragment upstream of *lacZ*. Error bars represent standard deviation (n=3).

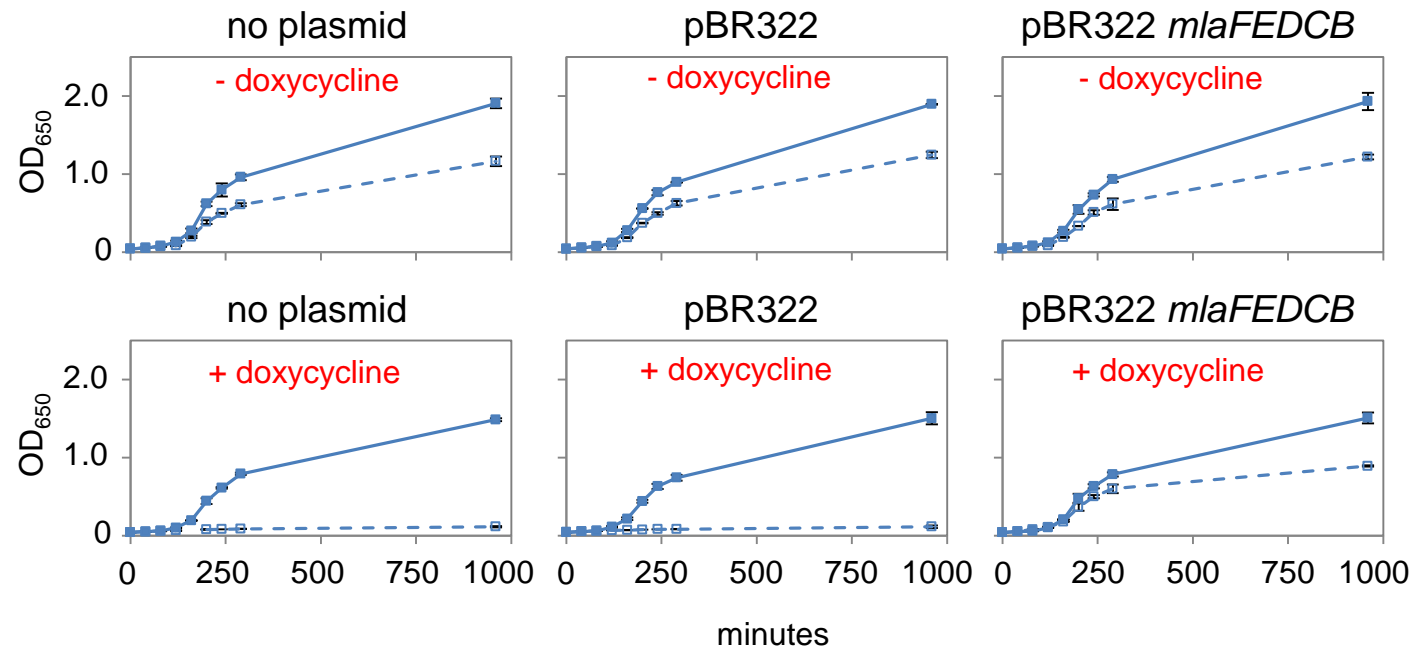

**Supplementary Figure 7: Complementation of the *mIaE*::kan phenotype by *mIaFEDCB*.** The graph shows OD<sub>650</sub> values obtained for liquid cultures of strain BW25113 *mIaE*::kan grown in the presence or absence of 1.0 µg/ml doxycycline. The BW25113 *mIaE*::kan cells were transformed with pBR322 derivatives encoding *mIaFEDCB* under the control of the *mIaF1* fragment. Error bars represent standard deviation (n=3).



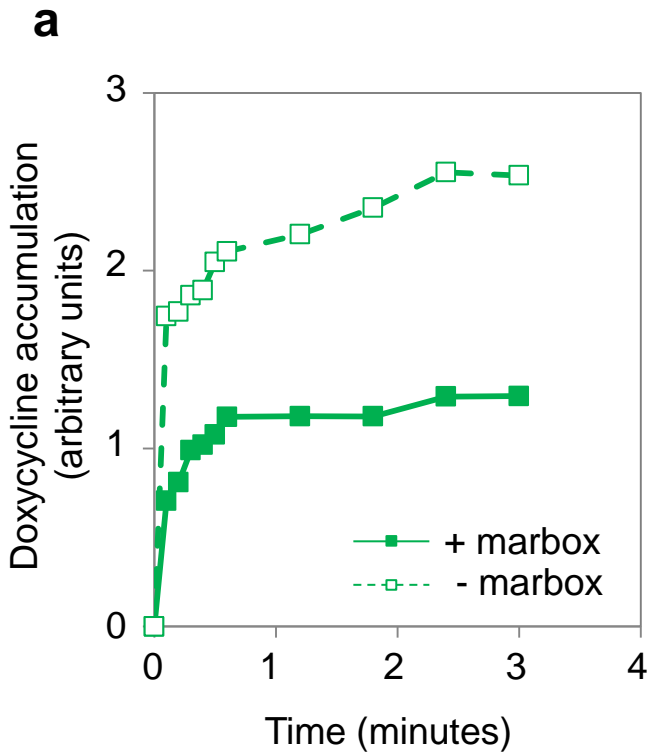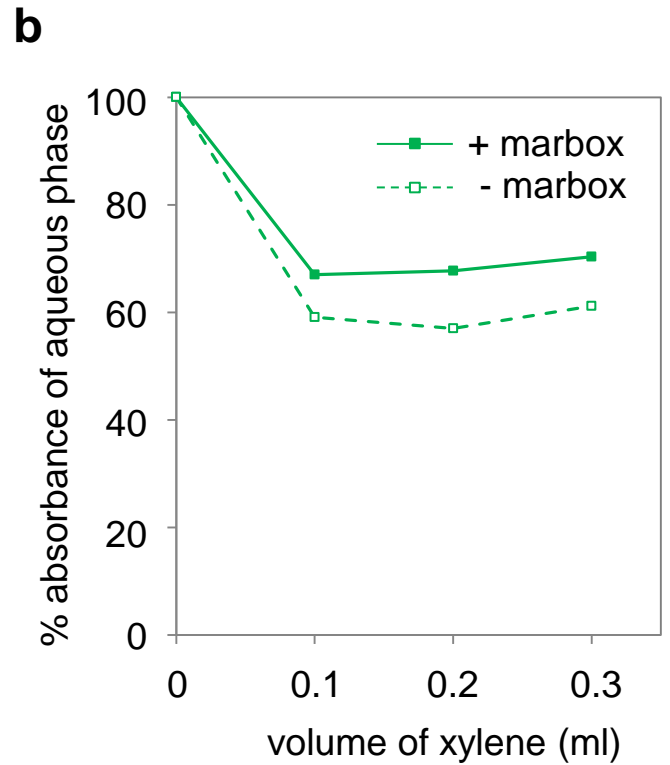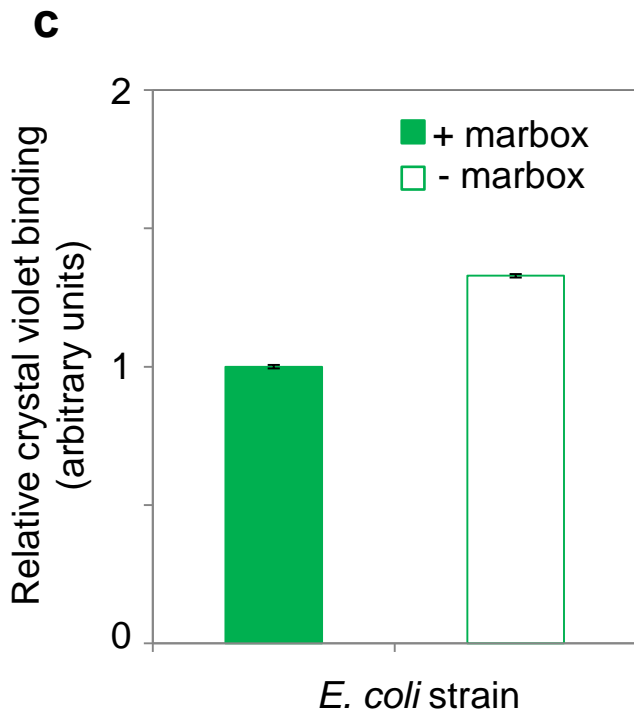

**Supplementary Figure 8: The *miaFEDCB* *marbox* is required for effective barrier function and optimal surface hydrophobicity.** Panel a) shows accumulation of doxycycline as a function of time for BW25113 *miaE::kan* cells transformed with pBR322 encoding *miaFEDCB* under the control of the *miaF1* (+*marbox*, solid line) or the *miaF2* (-*marbox*, dashed line) promoter fragments. Panel b) depicts changes in absorbance of an aqueous suspension of bacterial cells after mixing with p-xylene. The % absorbance is relative to that obtained with no p-xylene, at equilibrium. Data points are coloured as in panel a). The indicated volume of p-xylene is shown on the x-axis. The bar graph (c) shows relative crystal violet adsorption by BW25113 *miaE::kan* cells transformed with pBR322 encoding *miaFEDCB* under the control of the *miaF1* (solid bar) or the *miaF2* (open bar). Error bars represent standard deviation (n=3).

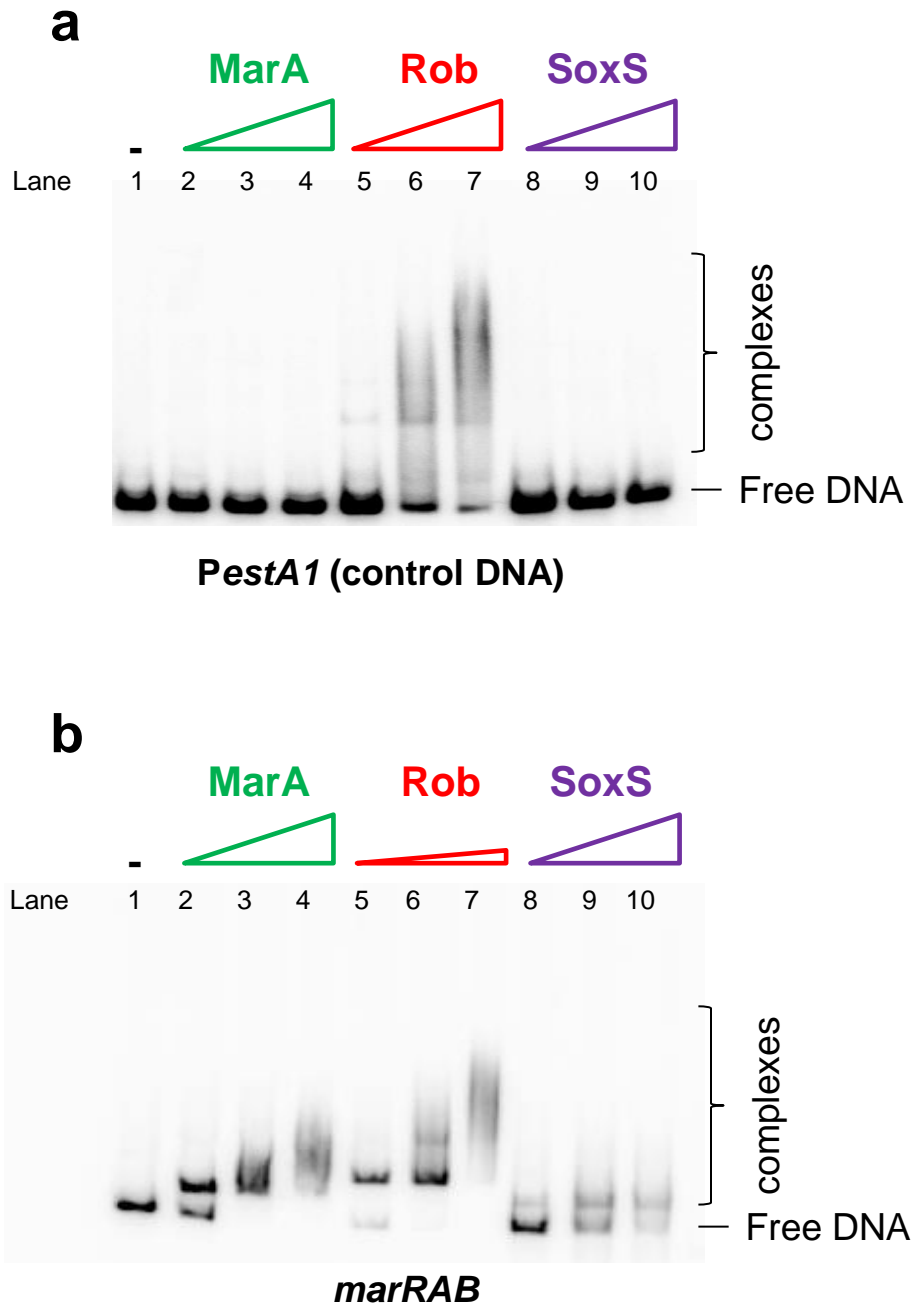

**Supplementary Figure 9: Rob binds DNA with high affinity but low specificity.** Panel a) shows the results of an electrophoretic mobility shift assay. Proteins (0.4, 1.2 or 2  $\mu$ M) were incubated with the *PestA1* DNA fragment that does not contain a marbox. Panel b) shows binding of MarA and SoxS (0.4, 1.2 or 2  $\mu$ M) or Rob (0.08, 0.24 or 0.4  $\mu$ M) to a DNA fragment containing the *marRAB* promoter.

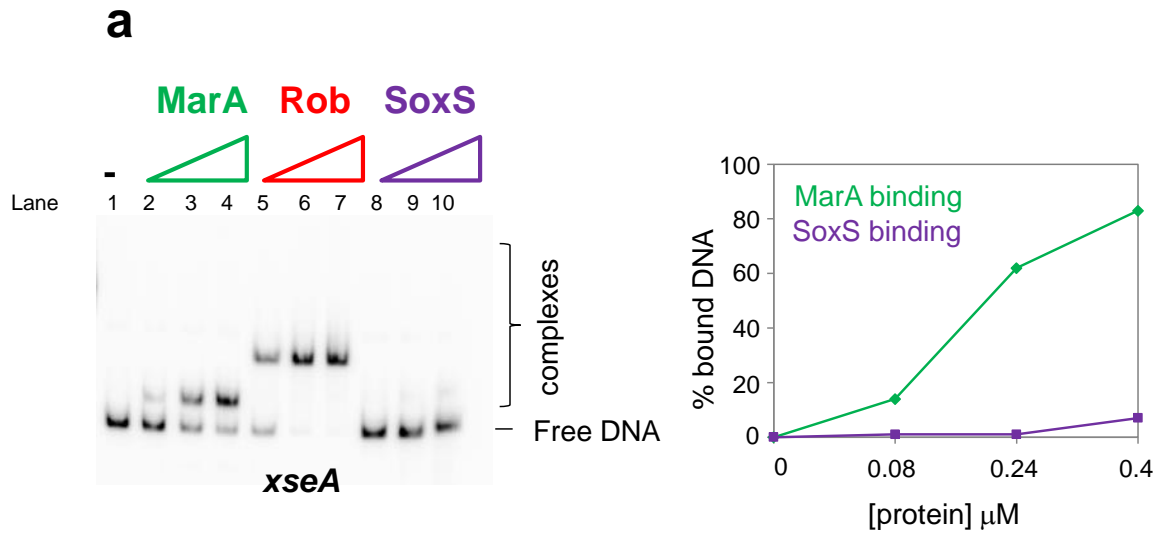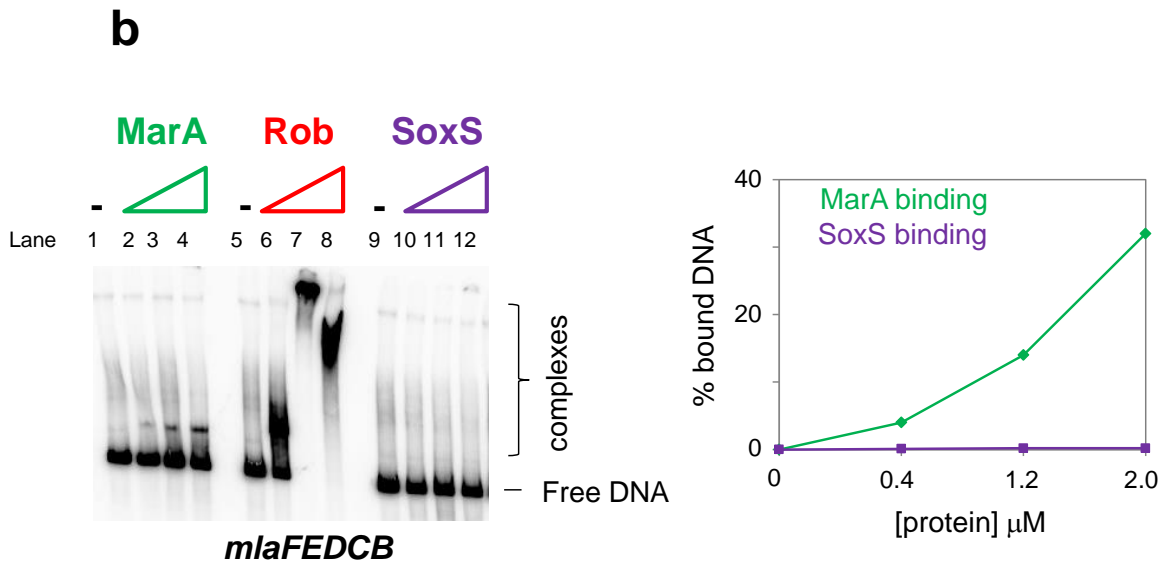

**Supplementary Figure 10: The *xseA* and *mlaFEDCB* and regulatory regions preferentially bind MarA rather than SoxS.** The figure shows binding of MarA, Rob or SoxS to the a) *xseA*1 or b) *mlaF*1 DNA fragments. For each experiment, the % free DNA was determined for each protein concentration as illustrated in the line graphs.

a

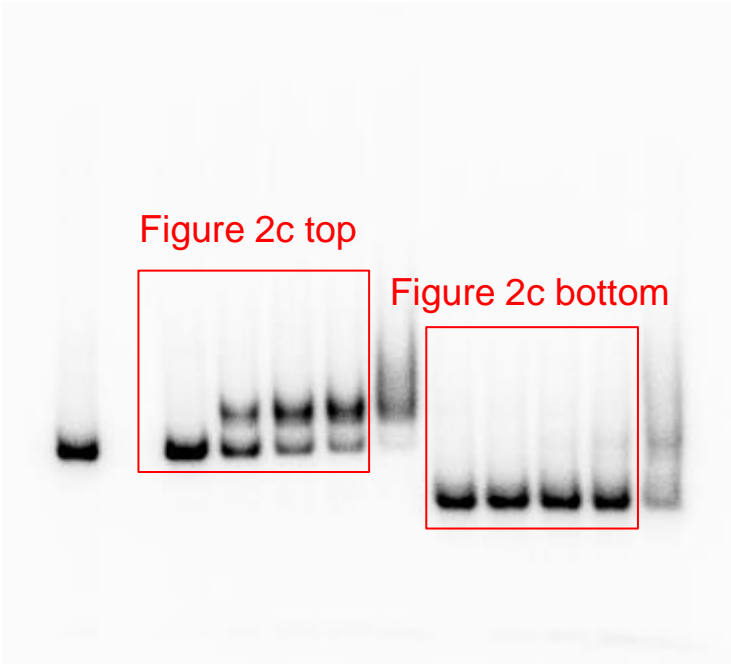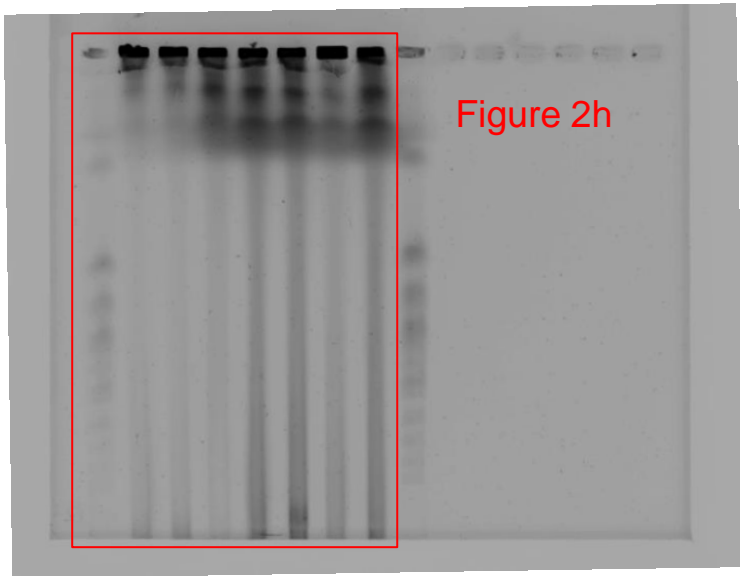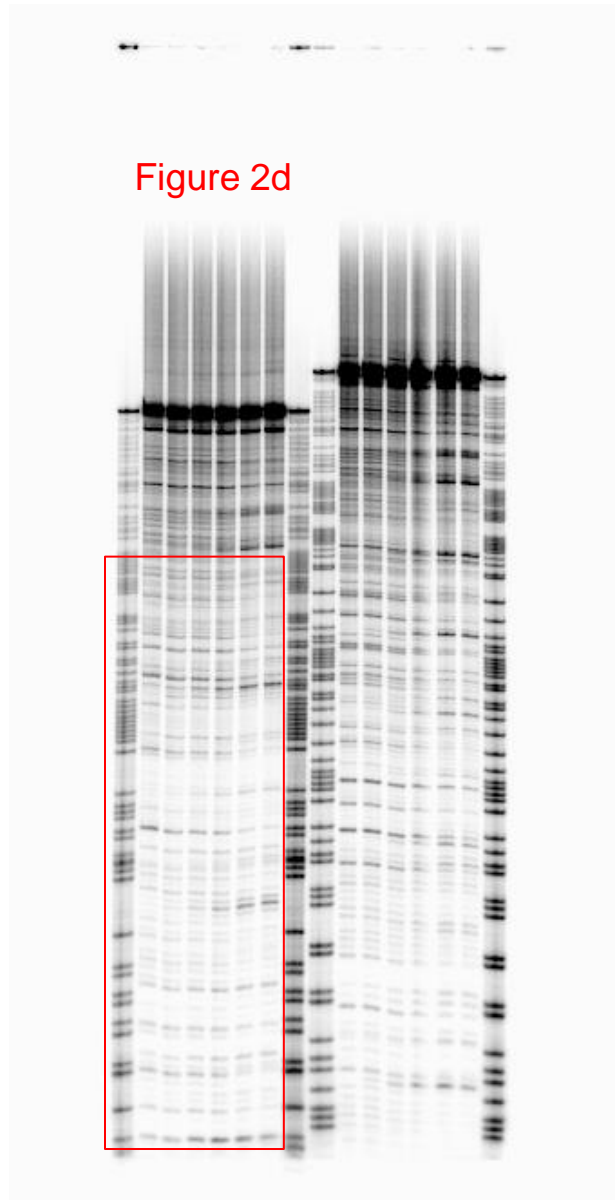

**b**

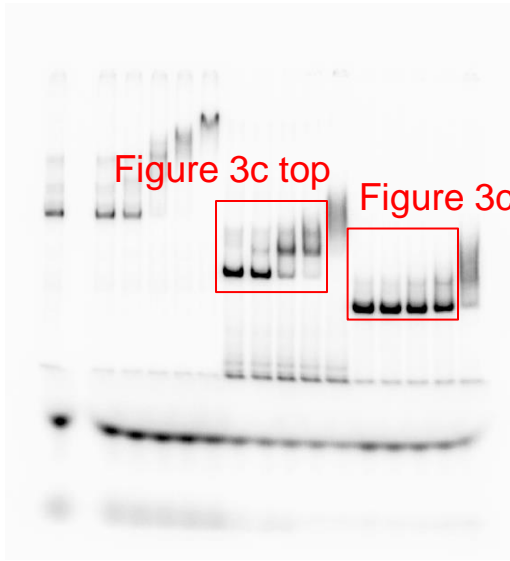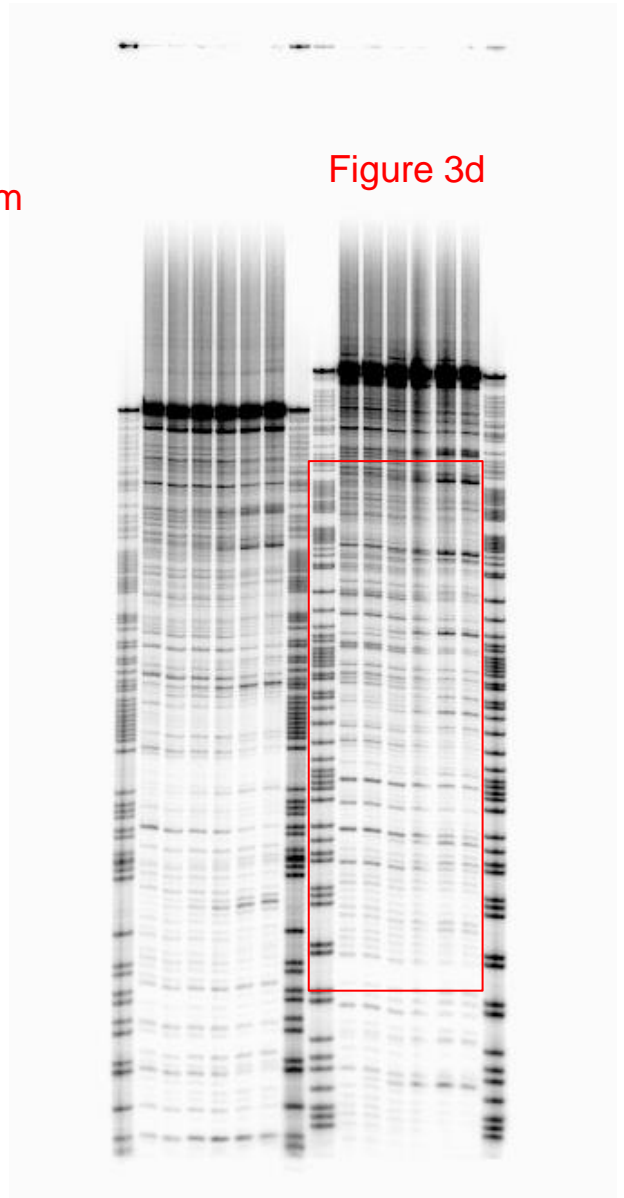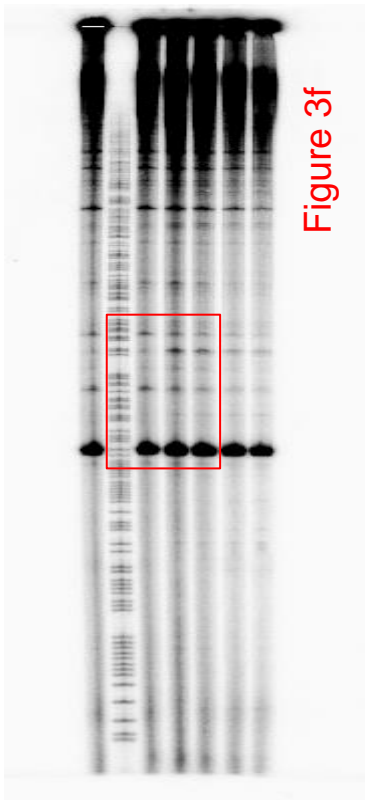

C

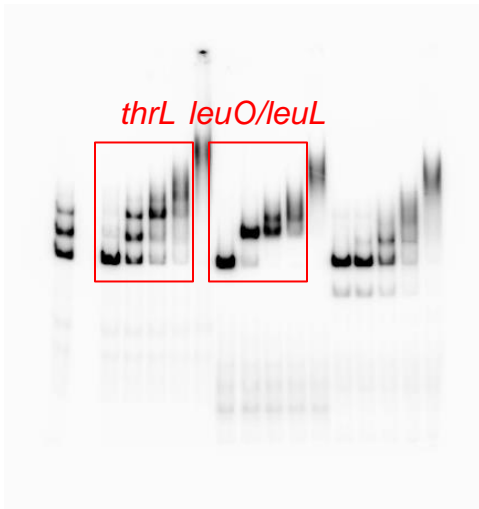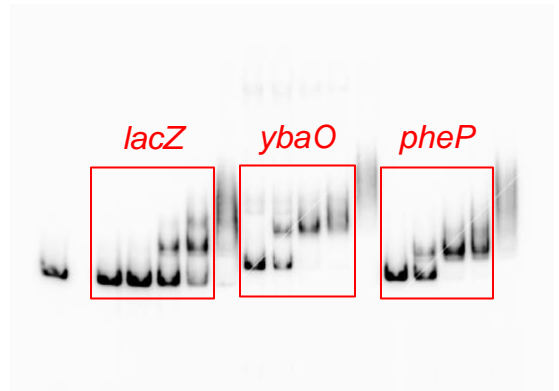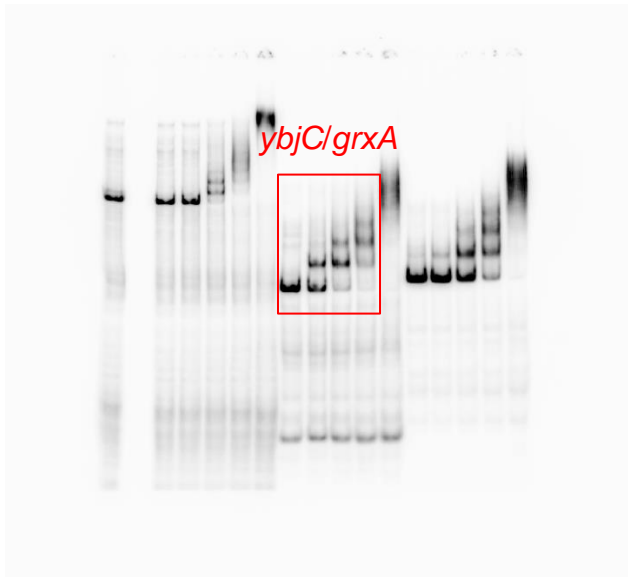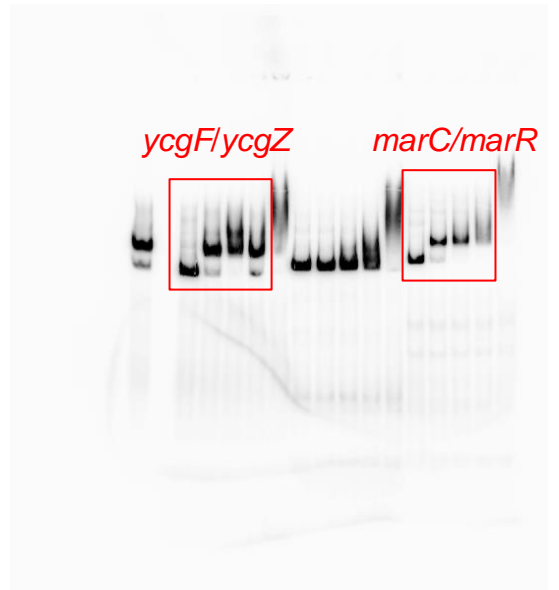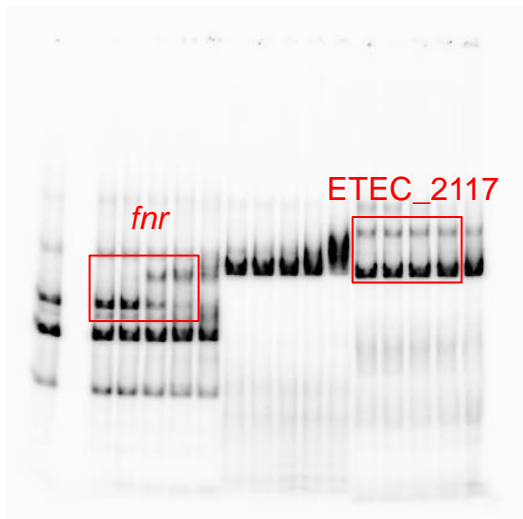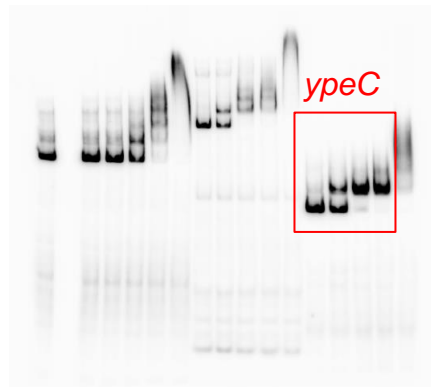

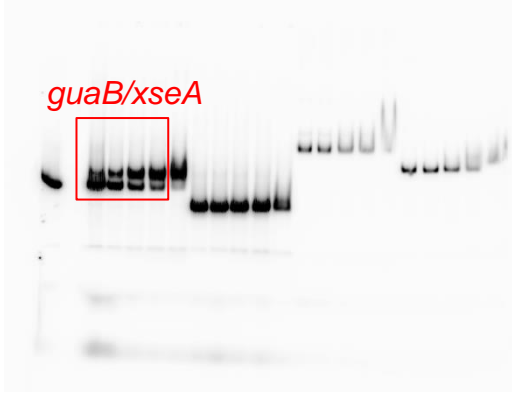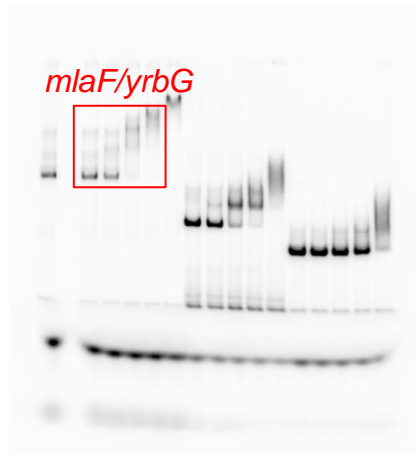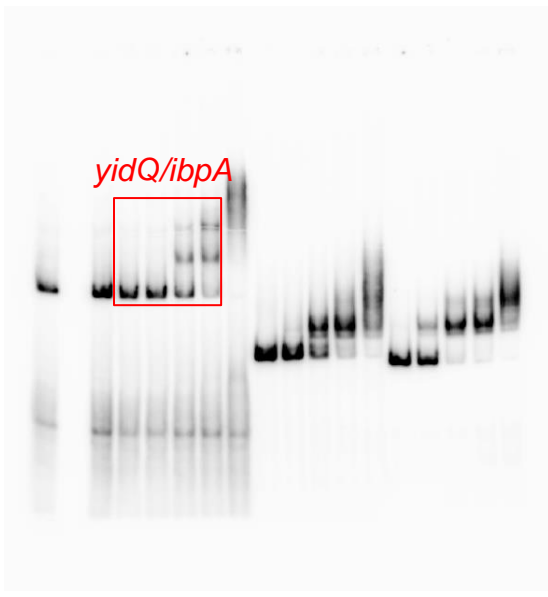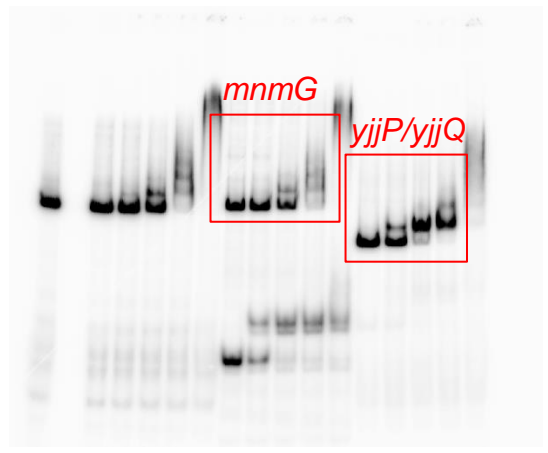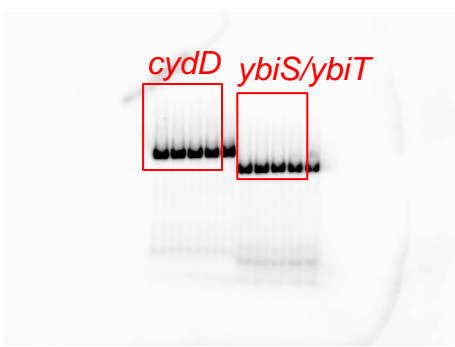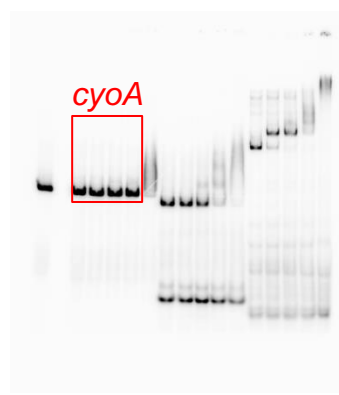

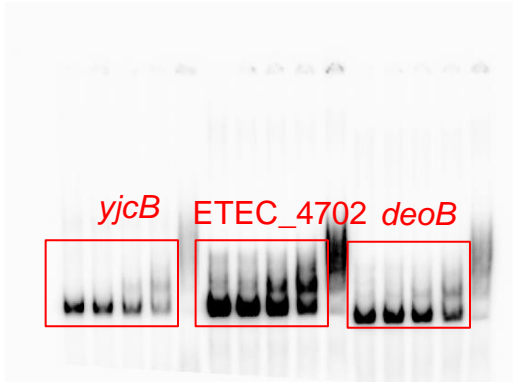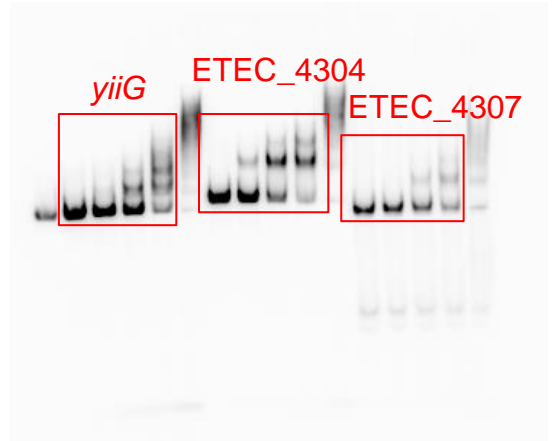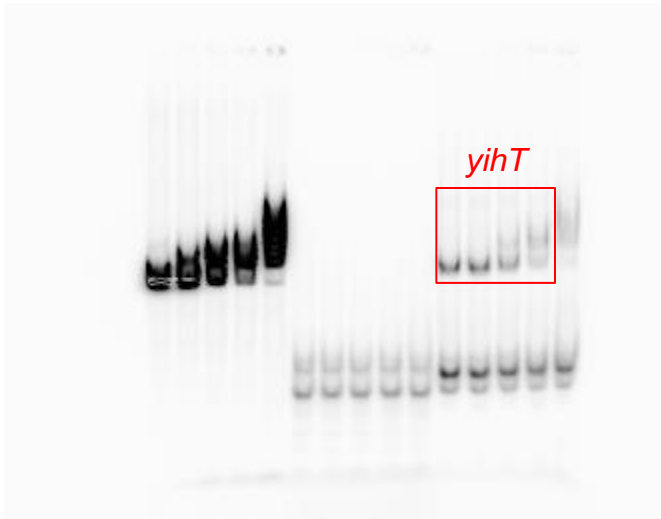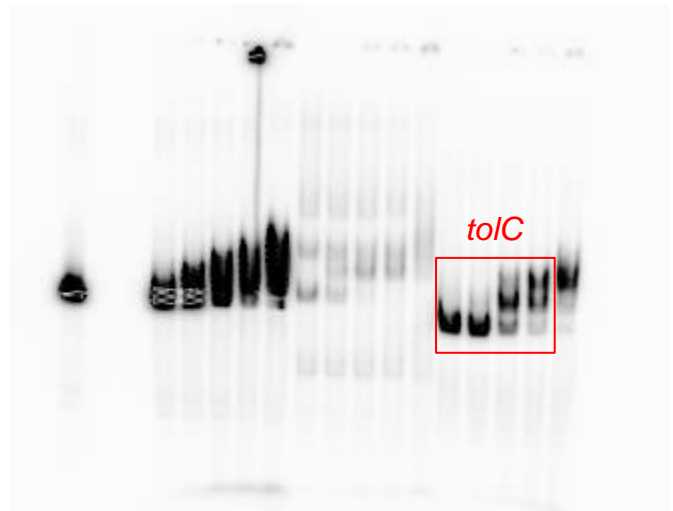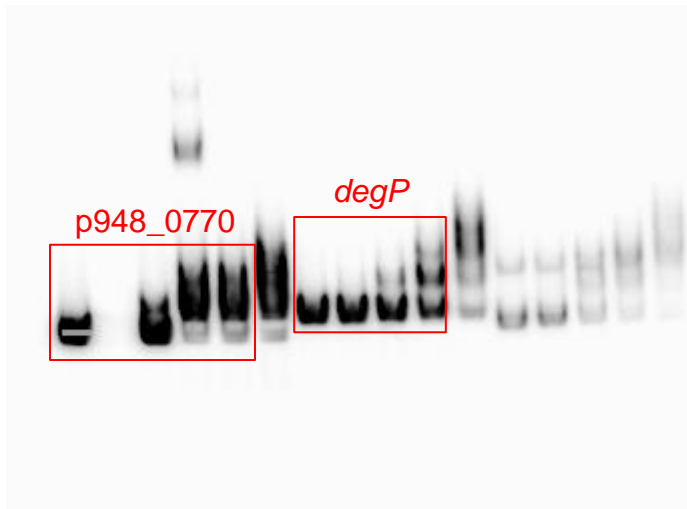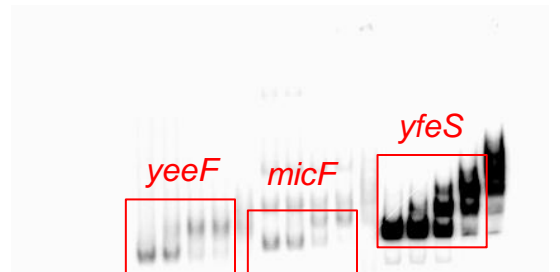



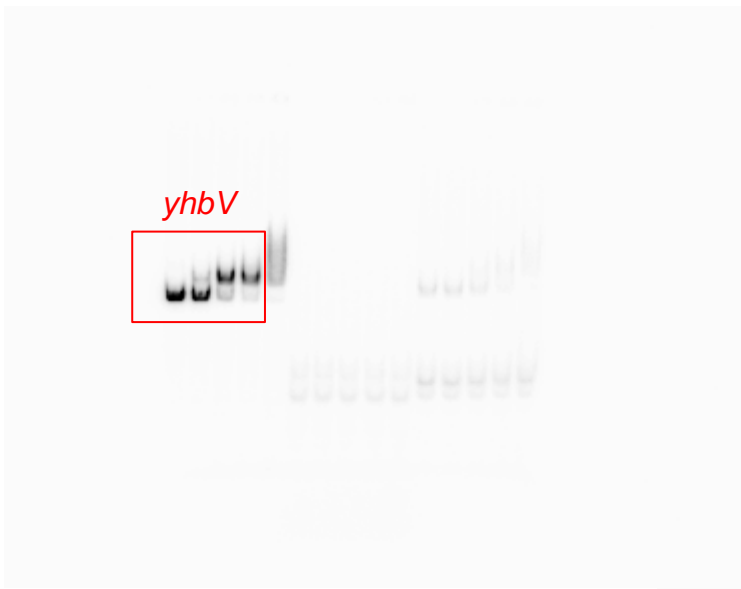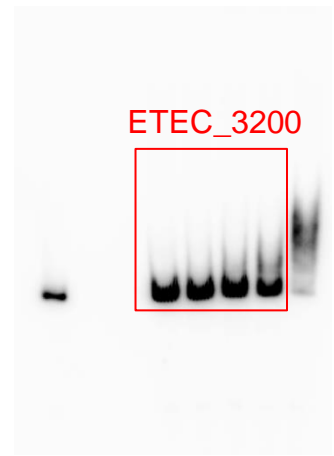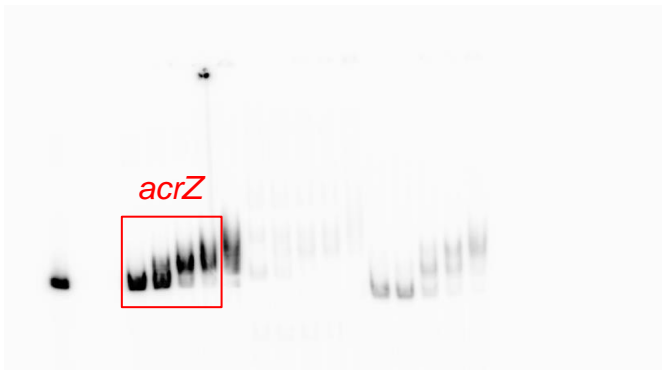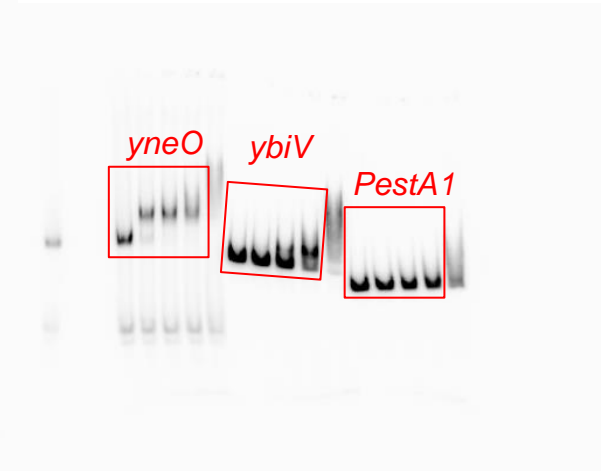

d

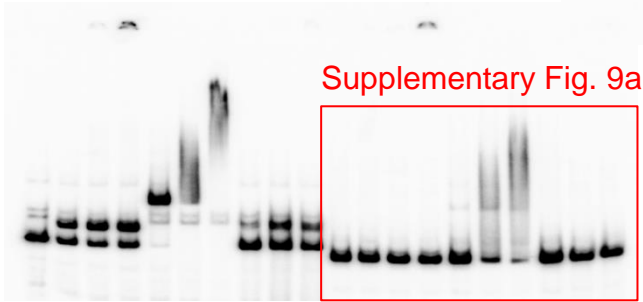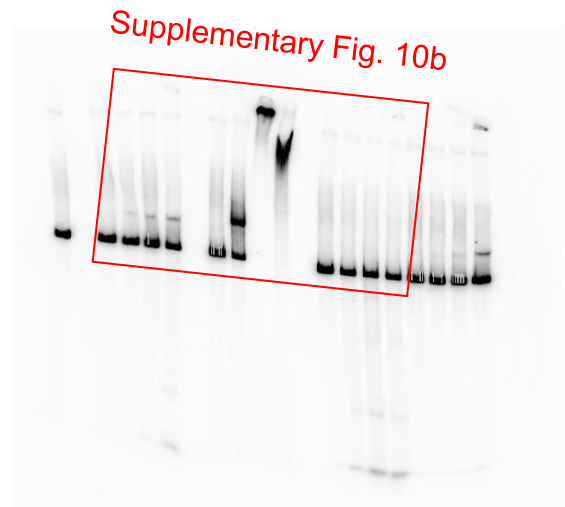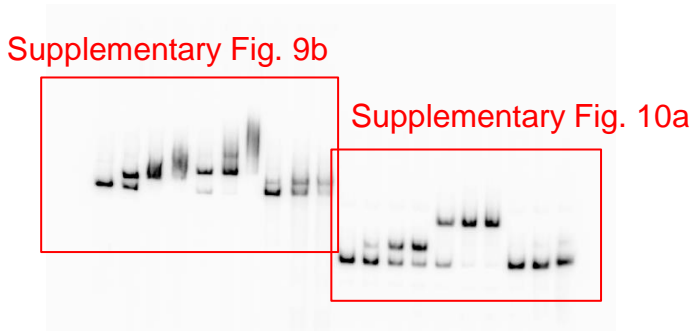

**Supplementary Figure 11: Uncropped gel images.** The images correspond to gels presented in a) Figure 2 b) Figure 3 c) Supplementary Fig. 1 and d) Supplementary Fig. S9-10.
